# Supplementary material
Source: MDPI journal article supplement (https://www.mdpi.com/1999-4907/15/5/763)
Supplement: s1 [file s1]

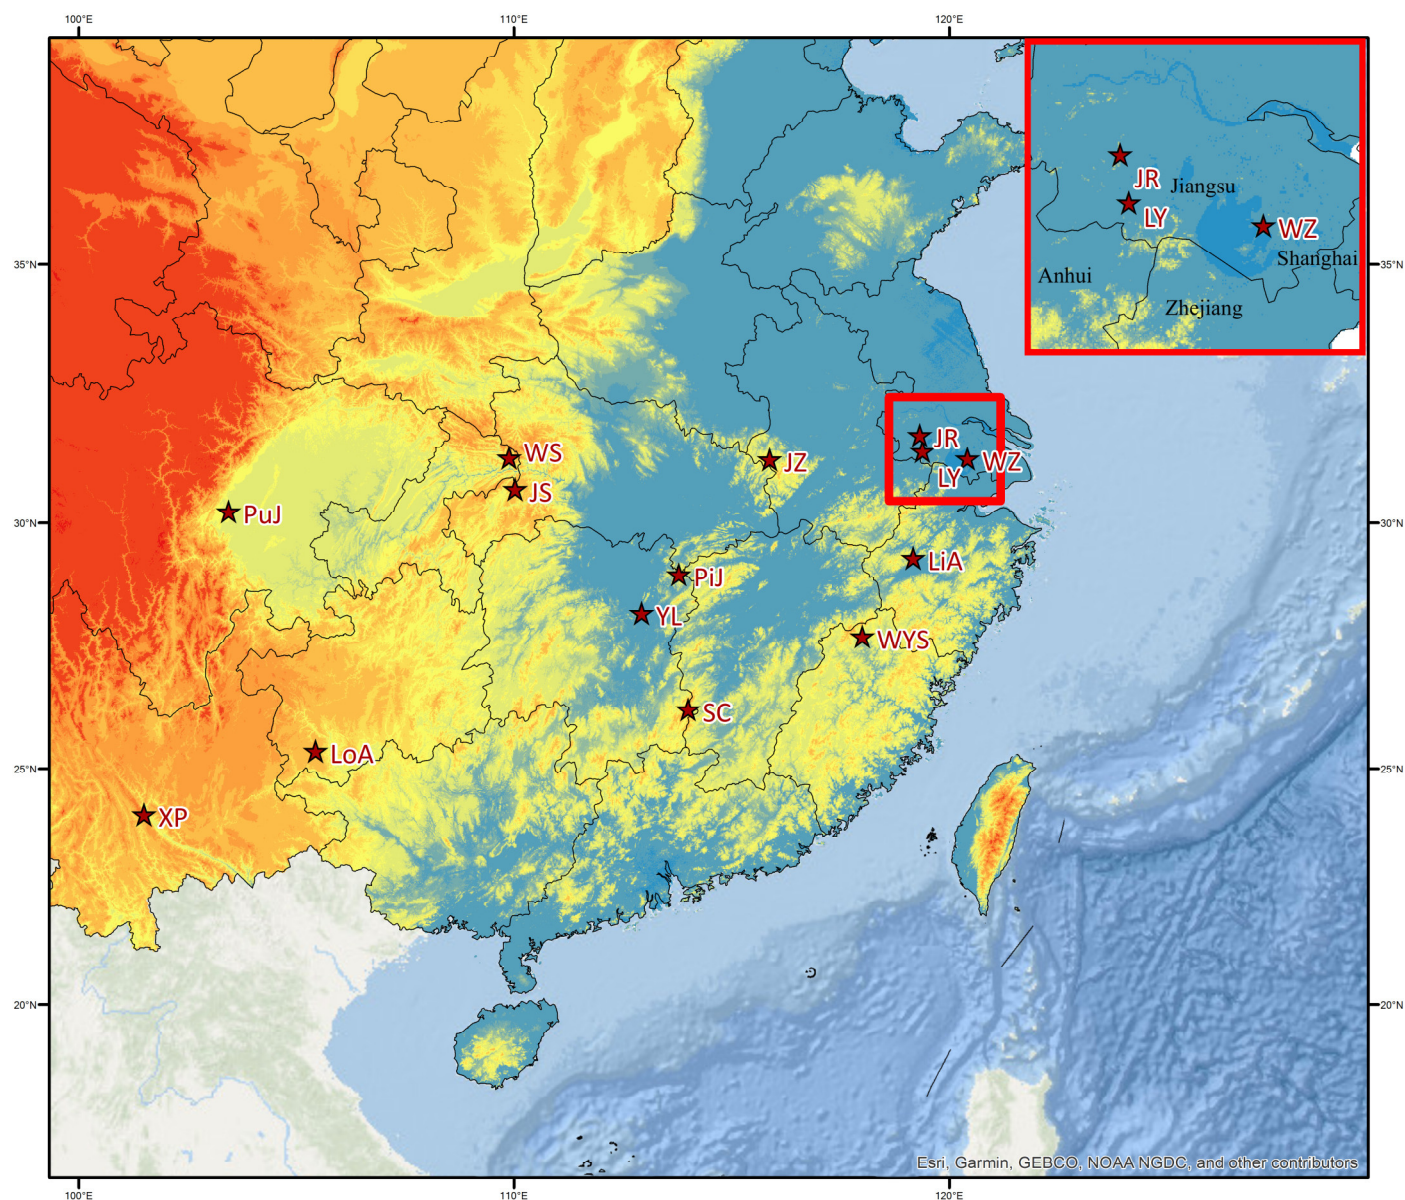

**Figure S1.** The geographical distribution of 14 populations of *Ilex chinensis*.

**Table S1.** Accession data for the populations of *Ilex chinensis*.

| Location                   | Population code | Sample size | Longitude (E) | Latitude (N) | Altitude (m) |
|----------------------------|-----------------|-------------|---------------|--------------|--------------|
| Southeast                  |                 |             |               |              |              |
| Wuzhong, Suzhou, Jiangsu   | WZ              | 30          | 120.423736    | 31.2627675   | 234          |
| Liyang, Changzhou, Jiangsu | LY              | 30          | 119.391389    | 31.409722    | 82           |
| Jurong, Zhenjiang, Jiangsu | JR              | 30          | 119.325000    | 31.726111    | 73           |
| Lin'an, Hangzhou, Zhejiang | LiA             | 27          | 119.177694    | 29.294583    | 146          |
| Wuyishan, Nanping, Fujian  | WYS             | 24          | 118.005104    | 27.711914    | 214          |
| Central                    |                 |             |               |              |              |
| Jinzhai, Lu'an, Anhui      | JZ              | 30          | 115.877055    | 31.245361    | 414          |
| Jianshi, Enshi, Hubei      | JS              | 30          | 110.028825    | 30.662899    | 791          |
| Yuelu, Changsha, Hunan     | YL              | 27          | 112.932705    | 28.188348    | 190          |
| Pingjiang, Yueyang, Hunan  | PiJ             | 21          | 113.793436    | 28.968811    | 463          |
| Suichuan, Ji'an, Jiangxi   | SC              | 30          | 114.004337    | 26.218344    | 877          |
| Southwest                  |                 |             |               |              |              |
| Wushan, Congqing           | WS              | 30          | 109.892250    | 31.280305    | 659          |
| Pujiang, Chengdu, Sichuan  | PuJ             | 30          | 103.440972    | 30.223472    | 564          |
| Xinping, Yuxi, Yunnan      | XP              | 30          | 101.502327    | 24.040277    | 2370         |
| Longan, Qianxinan, Guizhou | LoA             | 32          | 105.443165    | 25.362817    | 1214         |

**Table S2.** Primer sequences and fragment size information for 11 microsatellite loci.

| Locus code  | Forward Primer (5'→3')  | Reverse Primer (5'→3')   | Expected product Size |
|-------------|-------------------------|--------------------------|-----------------------|
| Ilex-SSR-01 | CTGGTGGATGAACAAGAAGAAAC | GCCTATGTGACTTGTCAGCTCTT  | 151                   |
| Ilex-SSR-28 | GTGGATAGTGGTCACGAAAATGT | AGACCTCAATCACCATGTCTCTC  | 116                   |
| Ilex-SSR-29 | ACGGGAGGGTTAATTACTGTTTC | TCTCTCTTCAAAACCAGACATCC  | 156                   |
| Ilex-SSR-32 | ATGCCTTGGTCAGTTTCAATTA  | ATTGTCTTACCGCATCTATCGAA  | 159                   |
| Ilex-SSR-34 | CATAGACTGAGATCTGTCGCCTT | ACAAGCAATTGGAACAACAATT   | 150                   |
| Ilex-SSR-41 | TAGCTACGACTCCTGCTGTAACC | AGGCCATATAGAAAAGAATTGCC  | 138                   |
| Ilex-SSR-68 | CACGAACATACACACAGATGTCA | ATCTCTGATTCATCATGCTACCC  | 128                   |
| Ilex-SSR-69 | TCTTCGAACCAAATTGATAAAGC | AAAATAAAGCTGAGACCTTTGCAG | 156                   |
| Ilex-SSR-74 | AATCACAGGCATCTATACGGTTG | GCCGGTACACTTTCCTTTATCAC  | 152                   |
| Ilex-SSR-75 | CAAGGATGTTCCAAGTTTCTCAG | GCTGATGGAAAAGTACACTCCAC  | 150                   |
| Ilex-SSR-79 | CTTGTAACCGGTAGAAAAGGAGG | TTGTGGCCTTTAGATTGCTCTAC  | 145                   |

**Table S3.** The proportion of 4 genetic branches in 14 populations.

| Population<br>Code | q I (%)<br>Green | q II (%)<br>Blue | qIII(%)<br>Yellow | qIV(%)<br>Red |
|--------------------|------------------|------------------|-------------------|---------------|
| Southeast          |                  |                  |                   |               |
| WZ                 | 0.013            | 0.924            | 0.038             | 0.025         |
| LY                 | 0.007            | 0.892            | 0.099             | 0.002         |
| JR                 | 0.011            | 0.755            | 0.035             | 0.200         |
| LiA                | 0.054            | 0.864            | 0.077             | 0.006         |
| WYS                | 0.016            | 0.327            | 0.654             | 0.003         |
| Central            |                  |                  |                   |               |
| JZ                 | 0.040            | 0.263            | 0.683             | 0.014         |
| JS                 | 0.019            | 0.059            | 0.919             | 0.003         |
| YL                 | 0.020            | 0.020            | 0.955             | 0.005         |
| PiJ                | 0.127            | 0.031            | 0.784             | 0.058         |
| SC                 | 0.027            | 0.170            | 0.665             | 0.138         |
| Southwest          |                  |                  |                   |               |
| WS                 | 0.093            | 0.036            | 0.869             | 0.003         |
| PuJ                | 0.008            | 0.043            | 0.946             | 0.003         |
| XP                 | 0.004            | 0.165            | 0.004             | 0.828         |
| LoA                | 0.984            | 0.006            | 0.008             | 0.002         |
